# Supplementary material
Source: publisher figshare collection journal article supplement (https://future-science-group.figshare.com/ndownloader/files/30753301)

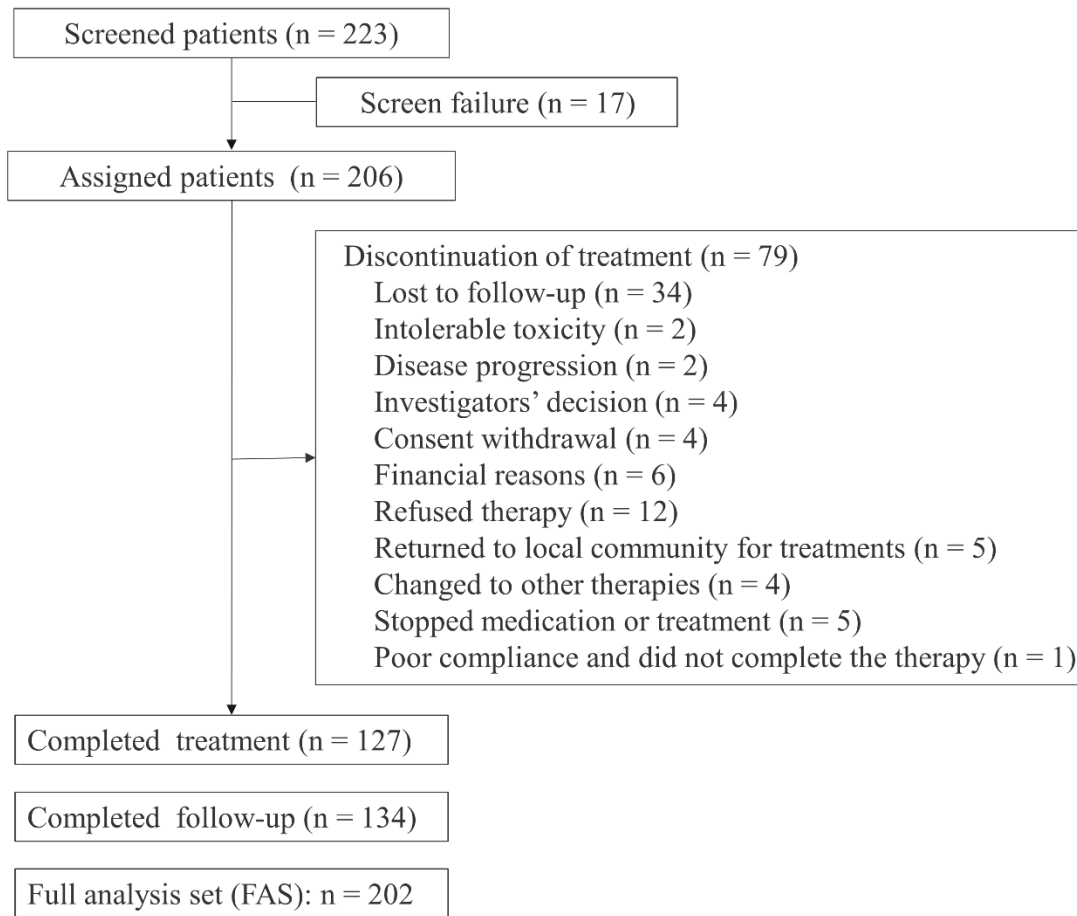

**Supplementary Figure 1. Flowchart of patient recruitment procedures**

Supplement: Supplementary file 1 [file 30753301]
